# Supplementary material for: The very early evolution of protein translocation across membranes
Source: PubMed Central journal article supplement (PMC7987157; doi:10.1371/journal.pcbi.1008623), 2021-03-08

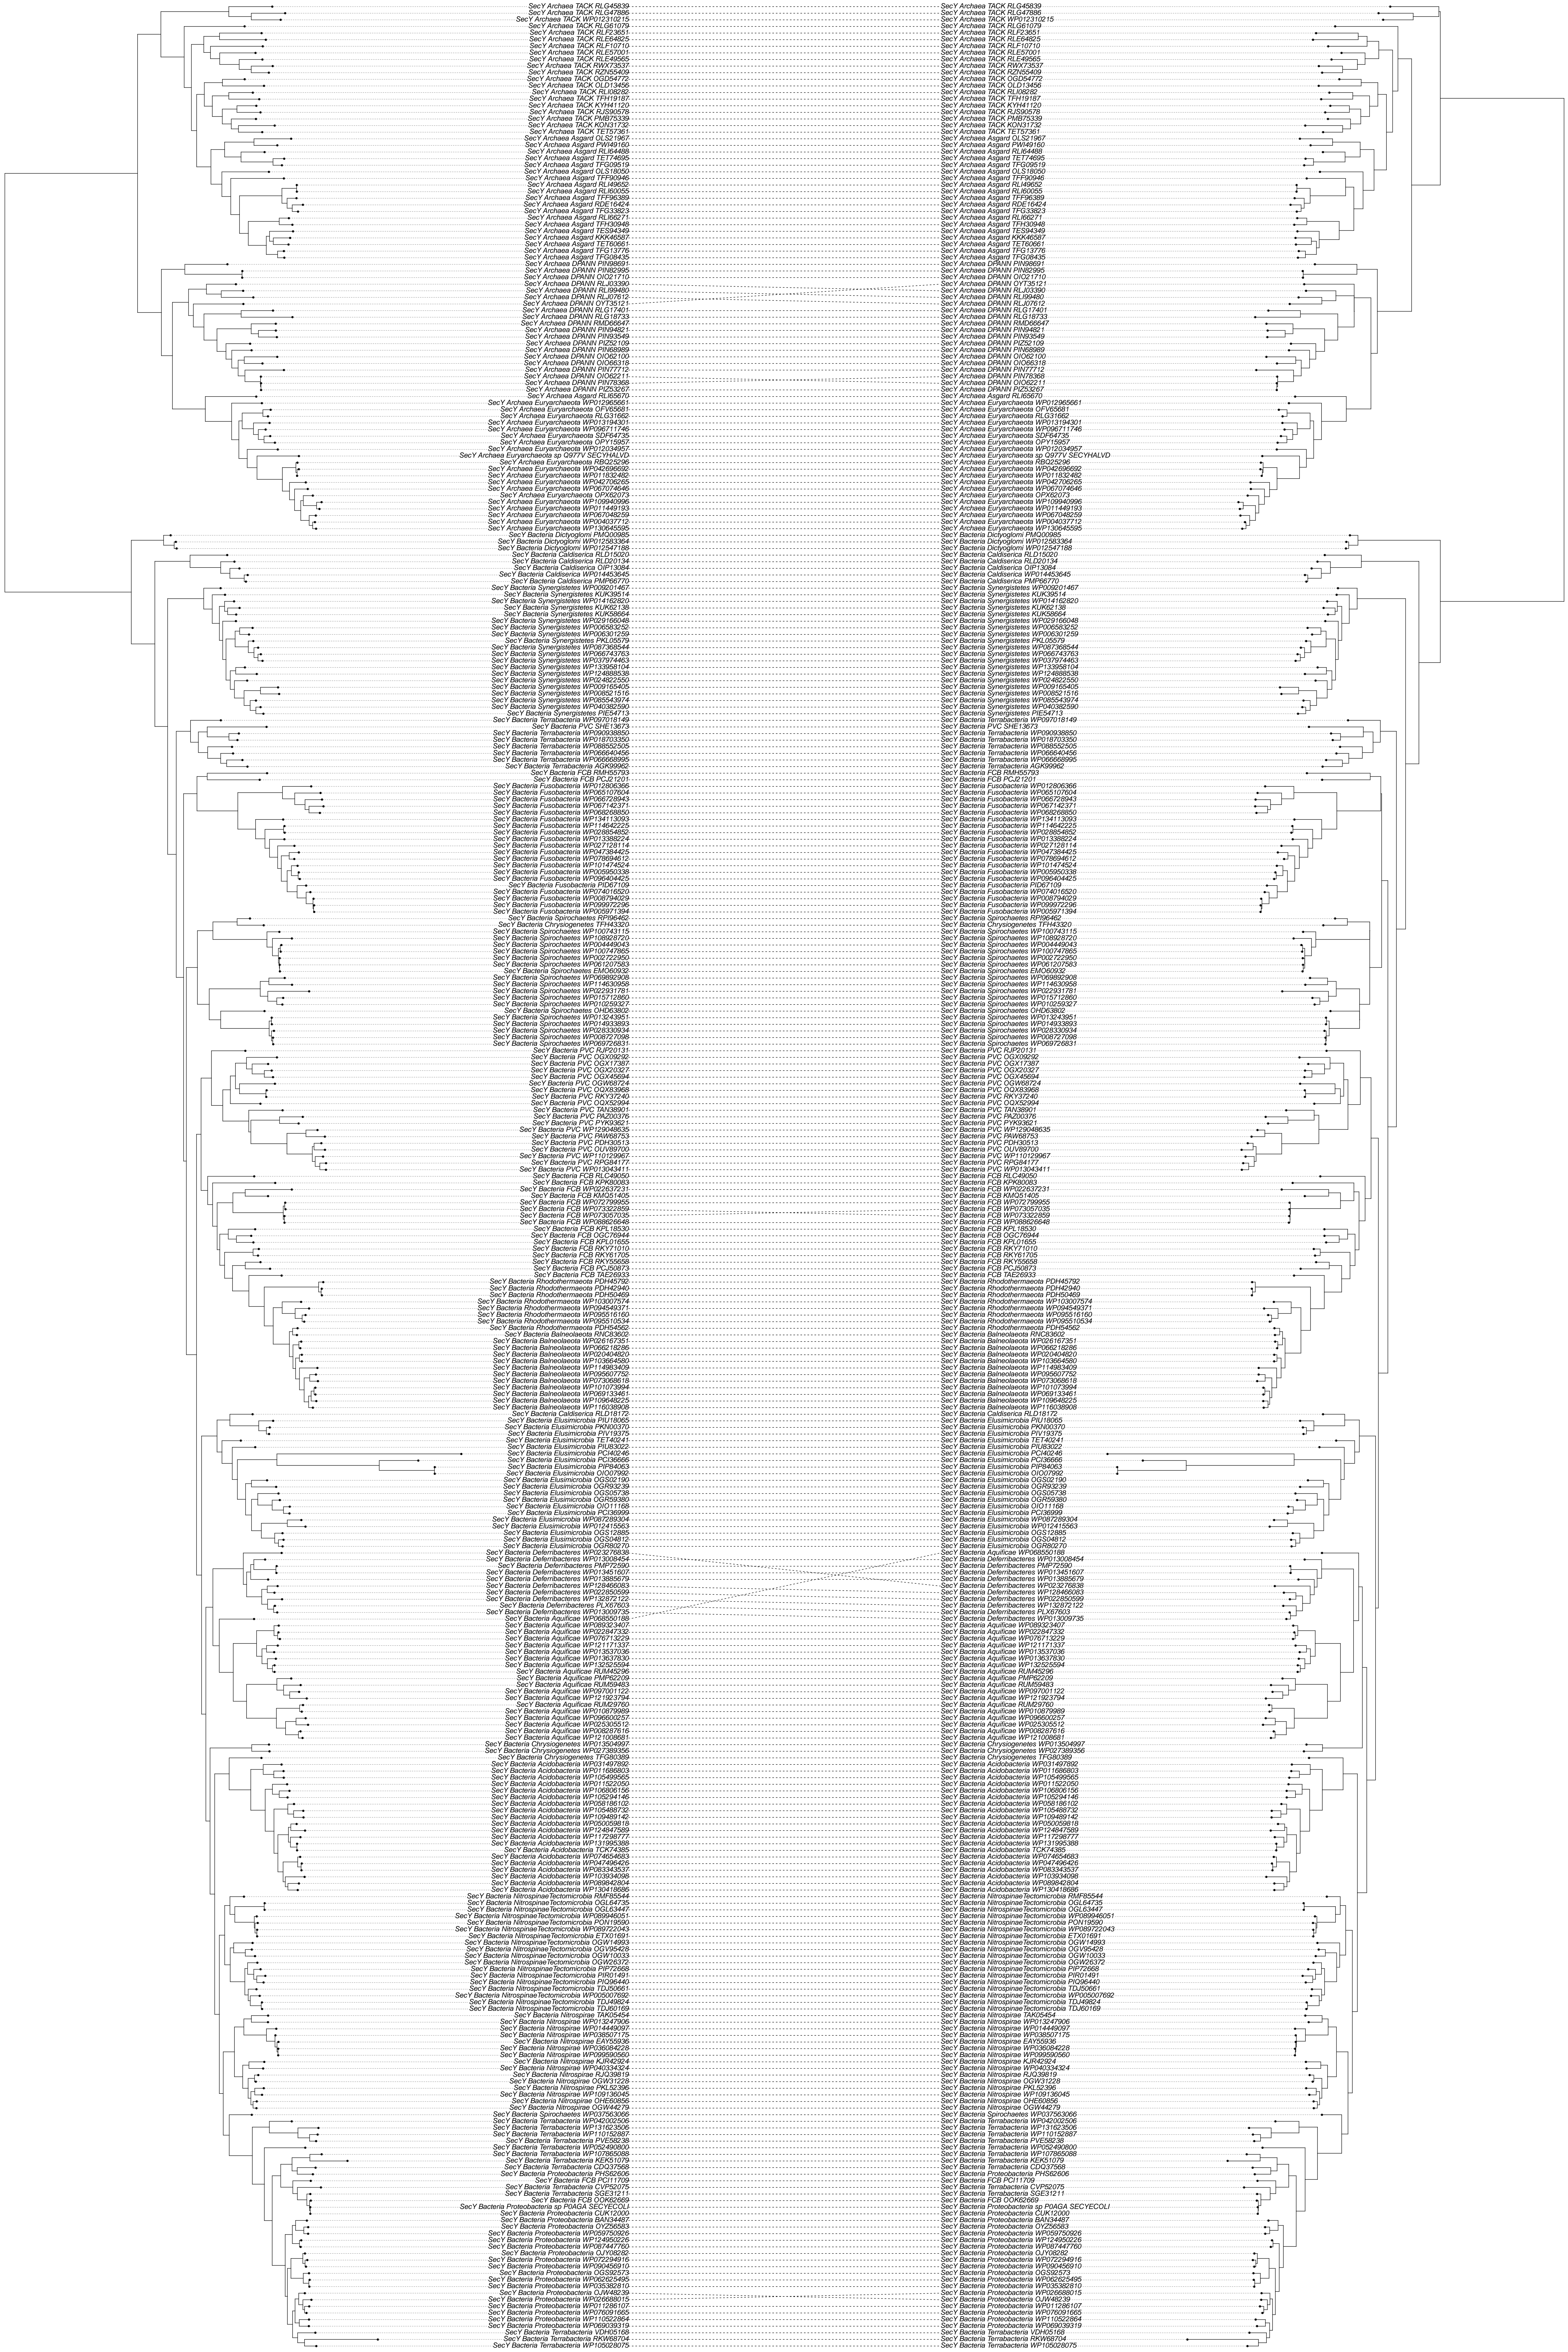

Supplement: pcbi.1008623.s014.pdf [file pcbi.1008623.s014.pdf]
