# Supplementary material for: The very early evolution of protein translocation across membranes
Source: PubMed Central journal article supplement (PMC7987157; doi:10.1371/journal.pcbi.1008623), 2021-03-08
Supplement: pcbi.1008623.s016.pdf [file pcbi.1008623.s016.pdf]

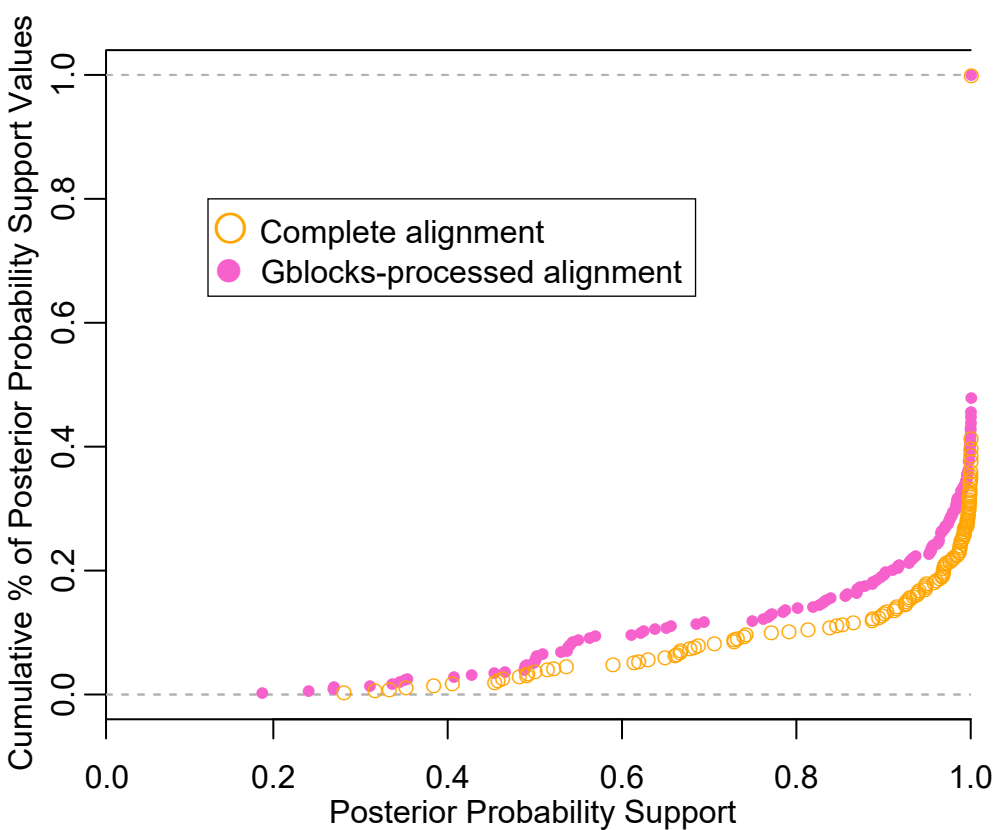

Comparison of posterior probabilities using unpaired t-test

H: ○ > ●

$T_{\text{stat}} = 2.18$

$p = 0.015$
